# The Critical Role of Astragalus Polysaccharides for the Improvement of PPAR $\alpha$ -Mediated Lipotoxicity in Diabetic Cardiomyopathy

Wei Chen<sup>1</sup>, Yanping Xia<sup>1</sup>, Xuelan Zhao<sup>1</sup>, Hao Wang<sup>3</sup>, Wenjie Chen<sup>1</sup>, Maohua Yu<sup>1</sup>, Yiming Li<sup>2</sup>, Hongying Ye<sup>2\*</sup>, Yu Zhang<sup>1\*</sup>

**1** Department of Geriatrics, Hushan Hospital, Fudan University School of Medicine, Shanghai, China, **2** Department of Endocrinology, Huashan Hospital, Fudan University School of Medicine, Shanghai, China, **3** Core Center of Animal Facility, Fudan University School of Medicine, Shanghai, China

## Abstract

**Background:** Obesity-related diabetes mellitus leads to increased myocardial uptake and oxidation of fatty acids, resulting in a form of cardiac dysfunction referred to as lipotoxic cardiomyopathy. We have shown previously that Astragalus polysaccharides (APS) administration was sufficient to improve the systemic metabolic disorder and cardiac dysfunction in diabetic models.

**Methodology/Principal Findings:** To investigate the precise role of APS therapy in the pathogenesis of myocardial lipotoxicity in diabetes, db/db diabetic mice and myosin heavy chain (MHC)- peroxisome proliferator-activated receptor (PPAR)  $\alpha$  mice were characterized and administrated with or without APS with C57 wide-type mice as normal control. APS treatment strikingly improved the myocyte triacylglyceride accumulation and cardiac dysfunction in both db/db mice and MHC-PPAR $\alpha$  mice, with the normalization of energy metabolic derangements in both db/db diabetic hearts and MHC-PPAR $\alpha$  hearts. Consistently, the activation of PPAR $\alpha$  target genes involved in myocardial fatty acid uptake and oxidation in both db/db diabetic hearts and MHC-PPAR $\alpha$  hearts was reciprocally repressed by APS administration, while PPAR $\alpha$ -mediated suppression of genes involved in glucose utilization of both diabetic hearts and MHC-PPAR $\alpha$  hearts was reversed by treatment with APS.

**Conclusions:** We conclude that APS therapy could prevent the development of diabetic cardiomyopathy through a mechanism mainly dependent on the cardiac PPAR $\alpha$ -mediated regulatory pathways.

**Citation:** Chen W, Xia Y, Zhao X, Wang H, Chen W, et al. (2012) The Critical Role of Astragalus Polysaccharides for the Improvement of PPAR $\alpha$ -Mediated Lipotoxicity in Diabetic Cardiomyopathy. PLoS ONE 7(10): e45541. doi:10.1371/journal.pone.0045541

**Editor:** Tianqing Peng, University of Western Ontario, Canada

**Received:** June 1, 2012; **Accepted:** August 20, 2012; **Published:** October 1, 2012

**Copyright:** © 2012 Chen et al. This is an open-access article distributed under the terms of the Creative Commons Attribution License, which permits unrestricted use, distribution, and reproduction in any medium, provided the original author and source are credited.

**Funding:** This work was supported by Chinese State Natural Science Funds Commission (Grant No: 81001568), and Shanghai Health Bureau Science Funds for Chinese Medicine (Grant No: 2010QJ033A). The funders had no role in study design, data collection and analysis, decision to publish, or preparation of the manuscript.

**Competing Interests:** The authors have declared that no competing interests exist.

\* E-mail: billycai56@yahoo.com.cn (YZ); dryehongying@hotmail.com (HY)

## Introduction

Diabetes mellitus affects more than 180 million people around the world, and this number is anticipated to increase to 300 million by 2025, within which type 2 diabetes might account for 90–95% [1]. Cardiovascular disease is by now the leading cause of morbidity and mortality in diabetes. Although the underlying causes are multifactorial, the importance of cardiac dysfunction independent of coronary artery disease or hypertension, a condition termed as diabetic cardiomyopathy, has now been further emphasized [2,3].

Growing evidence suggests that altered myocardial substrate and energy metabolism mainly contribute to the development of diabetic cardiomyopathy [4]. The heart uses a variety of substrates for energy production, including fatty acids (FAs) and glucose. The diabetic heart is characterized by reduced glucose metabolism and enhanced FA utilization [5]. Data from several diabetic animal models indicated that diabetic hearts had elevated rates of FA oxidation, ectopic fat deposition and subsequent lipid peroxidation

by peroxisome proliferator-activated receptor (PPAR)  $\alpha$  regulatory pathways, leading to lipotoxic cardiomyopathy, which finally resulted in ventricular dysfunction [6,7]. Metabolic modulation to repress lipid oxidation and sustain glucose use in myocardium appeared to prevent cardiac dysfunction in models of severe type 2 diabetes [8,9]. Similar results were observed in human patients with type 2 diabetes, suggesting that pharmacological interventions that reduce cardiac FA utilization may improve cardiac performance [10,11].

Astragalus polysaccharide (APS), is one of the main active ingredients of astragalus membranaceus, a traditional herbal Chinese medicine. The polysaccharides are a mixture of APS I and II. APS I is a kind of heterosaccharide which is composed of D-glucose, D-galactose, and L-arabinose in molar ratios of 1.75:1.63:1, with the average molecular weight of 36.3 kDa. APS II is a kind of dextran with high molecular weight, bonded mainly with  $\alpha$ -(1 $\rightarrow$ 4)-D-glycosidic linkages [12]. Our previous study showed that APS administration strikingly improved the

systemic metabolic disorder in STZ- induced diabetic mice, with the reversal of hyperglycemia and hyperlipidemia. Moreover, treatment with APS also ameliorated cardiac dysfunction and well-protected myocardial ultrastructure in diabetic hearts [13–15]. However, whether APS therapy has direct effects on diabetic cardiomyopathy, independent of its influence on metabolic derangements systemically, is still unclear. To further explore the potential mechanism, we throw the hypothesis that APS may improve diabetic cardiomyopathy with the inhibition of myocardial lipotoxicity dependent on the cardiac PPAR $\alpha$  regulatory pathway. Transgenic mice with cardiac-restricted over-expression of PPAR $\alpha$  (myosin heavy chain [MHC]-PPAR $\alpha$  mice) exhibit a cardiac metabolic phenotype which is strikingly similar to that of the diabetic heart with increased FFA utilization and decreased uptake and oxidation of glucose, presenting features of lipotoxic cardiomyopathy without hyperlipidemia or hyperglycemia, including ventricular hypertrophy and dysfunction associated with myocardial lipid accumulation, which is exacerbated by a high fat (HF) diet enriched in long-chain FFA (LCFA) [3,6,10]. Therefore, in this study, diabetic db/db mice and MHC-PPAR $\alpha$  mice were characterized and administrated with or without APS, with C57 wide-type mice as normal control. To this end, we found that therapy with APS could well reverse the PPAR $\alpha$ -mediated myocardial lipotoxicity in the pathogenesis of diabetic cardiomyopathy.

## Materials and Methods

### Animal Experiments

Male homozygous B6.Cg-m+/+ Lep<sup>rd</sup>/J (*db/db*) mice and male MHC-PPAR $\alpha$  transgenic mice (404-3) in C57BL/6J background were obtained from the Jackson Laboratory (Bar Harbor, USA). All db/db mice were fed with standard chow, while all MHC-PPAR $\alpha$  transgenic mice were fed with a HF diet composed of 43% of calories from fat containing triacylglyceride (TAG) composed of LCFA (16:0 AND 18:1) till the end of experiment. Five-week-old db/db mice and MHC-PPAR $\alpha$  transgenic mice were both administrated with or without APS 2.0 g/kg/d until 20 weeks of age. Age-matched male C57BL/6J wild-type (Wt) mice (Laboratory Animal Unit of Fudan University School of Medicine) were fed with standard chow as the normal control. All mice were housed within Fudan University School of Medicine Animal Facility with free access to food and water. Mice were anesthetized with diethyl ether before sacrifice. Blood samples were obtained from the heart directly. The hearts were excised and ventricle tissues were frozen in liquid nitrogen. All animal experimental protocols were approved by the Animal Ethics Committee of Fudan University School of Medicine.

### Serum Chemistry

Serum levels of glucose, insulin, triacylglyceride (TAG) and free fatty acid (FFA) were determined using colorimetric assays by the Clinical Medical Research Unit Core Center at Huashan Hospital, Fudan University.

### Echocardiographic Studies

Before sacrifice, transthoracic M-mode and 2D echocardiographs were performed on conscious mice by using the Acuson Sequoia 256 Echocardiography System (Acuson, Mountain View, USA) with methods for measurements and chamber size using M-mode [16].

### Analyses of Myocardial TAG

After harvest, a midventricular slice of myocardium was snap-frozen in a cryomold containing OCT for sectioning. To detect neutral lipid, frozen sections were stained with oil red O and counterstained with hematoxylin. The quantitative analysis of myocardial TAG species by electrospray ionization mass spectrometry (ESI/MS) was performed by the Morphology Core of Fudan University School of Medicine [17].

### Cardiac Fuel Utilization Analyses

Basal rates of glucose and palmitate uptake in heart were assessed in awake mice by intravenously injecting 2-deoxy-D-[1-<sup>14</sup>C]glucose or [<sup>14</sup>C]palmitate (PerkinElmer Life and Analytical Sciences, USA), heart and plasma samples were obtained accordingly for the measurement of 2-[<sup>14</sup>C] deoxyglucose-6-phosphate (DG-G-P) or [<sup>14</sup>C] incorporation into triglyceride [18].

Mouse working hearts were perfused with Krebs–Henseleit solution containing 5 mmol/L glucose, 10  $\mu$ U/mL insulin, and 1.2 mmol/L palmitate. Myocardial FFA and glucose oxidation rates were determined by quantitative collection of <sup>3</sup>H<sub>2</sub>O or <sup>14</sup>CO<sub>2</sub> (PerkinElmer Life and Analytical Sciences, USA) produced by the hearts perfused with buffer containing [9,10-<sup>3</sup>H]palmitate or [U-<sup>14</sup>C] glucose. [18].

### Quantitative Real-Time RT-PCR Analysis

Total RNA was extracted from cardiac tissues using TRIzol reagent (Invitrogen, Carlsbad, USA), and was subjected to reverse transcription using the Superscript first-strand cDNA synthesis system (Promega, USA) according to the manufacturer's instruction (Table S1). The relative gene abundance was quantified by real-time PCR using GreenER<sup>TM</sup> qPCR Supermix (Invitrogen, Carlsbad, USA) as described previously [15]. The reactions were performed in an ABI 7000 sequence detection system. The sequences of primers are listed as table S1. The relative gene expression was analyzed using the 2<sup>(- $\Delta\Delta C_t$ )</sup> method and normalized against 18S rRNA.

### Western Blot Analyses and Enzyme Activity Analyses

Western blot analyses were performed with cardiac whole-cell extracts as previously described [15] by using GAPDH as loading control (Sigma, St Louis, USA). All protein bands corresponding to targeted antibodies (Sigma, St Louis, USA) were scanned for quantification of protein expression levels. The densities of the bands in samples of the db/db mice with different treatment were normalized to the densities of the corresponding bands in the C57 wide-type samples. PPAR $\alpha$  activities in myocardial tissue were also determined at the end of the experiment by RIA, and were measured using a modification of the procedure of Okunishi et al. (Peptide Institute Inc. USA).

### Statistical Analysis

All analyses were performed with the Statistical Package for Social Sciences version 14.0 (SPSS, Chicago, IL). Data are expressed as means  $\pm$  S.E.M. Statistical significance between the two groups was determined by using the Student's t-tests. In all statistical comparisons, a P value <0.05 was used to indicate a statistically significant difference.

## Results

### APS Rescued Cardiac Dysfunction in db/db Mice and MHC-PPAR $\alpha$ Mice

Diabetic cardiomyopathy is characterized by ventricular hypertrophy and diastolic dysfunction, finally leading to systolic ventricular dysfunction and overt congestive heart failure [19]. To determine the therapeutic effects of APS treatment on cardiac dysfunction in lipotoxic cardiomyopathy with or without diabetes, echocardiography was performed on both db/db mice and MHC-PPAR $\alpha$  mice with or without APS treatment. As expected, both db/db mice and MHC-PPAR $\alpha$  mice exhibited decreased reduced fractional shortening (FS) and the increased left ventricular (LV) chamber dilatation, as determined by measurement of systolic (LVSD) and diastolic (LVDD) internal diameters, compare with C57 Wt controls (Figure 1). However, the reduction of FS in both db/db mice and MHC-PPAR $\alpha$  mice were dramatically reversed by APS treatment, while the increase of LV chamber dilatation in db/db and MHC-PPAR $\alpha$  mice was also inhibited after APS administration (Figure 1 and Table 1).

Moreover, the expression of hypertrophic growth marker genes encoding brain-type natriuretic peptide (BNP) and skeletal  $\alpha$ -actin was induced in ventricle of both db/db mice and MHC-PPAR $\alpha$  mice, while the expression of sarcoplasmic/endoplasmic reticulum Ca<sup>2+</sup>ATPase 2a (SERCA2a), acting as an endogenous regulator of pathological cardiac growth and decreasing in diabetic hearts, was reduced in db/db diabetic hearts and MHC-PPAR $\alpha$  hearts, compared with those in C57 hearts (Figure 1). Meanwhile, the elevation of cardiac BNP and skeletal  $\alpha$ -actin expression together with the down-regulation of SERCA2a in db/db diabetic hearts and MHC-PPAR $\alpha$  hearts were all significantly normalized by APS treatment to the extent of C57 Wt controls (Figure 1).

On the other hand, although APS treatment had the significant systemic effect on the metabolic disorder in db/db mice, with decreases in the elevated levels of serum glucose, insulin, TAG and FFA, to the normal systemic metabolic state of MHC-PPAR $\alpha$  mice (Figure 2), the rescue of cardiac dysfunction and abnormal expression of cardiac marker genes in APS-treated MHC-PPAR $\alpha$  mice showed no difference from those in APS-treated db/db mice. Therefore, our finding demonstrated that APS treatment might

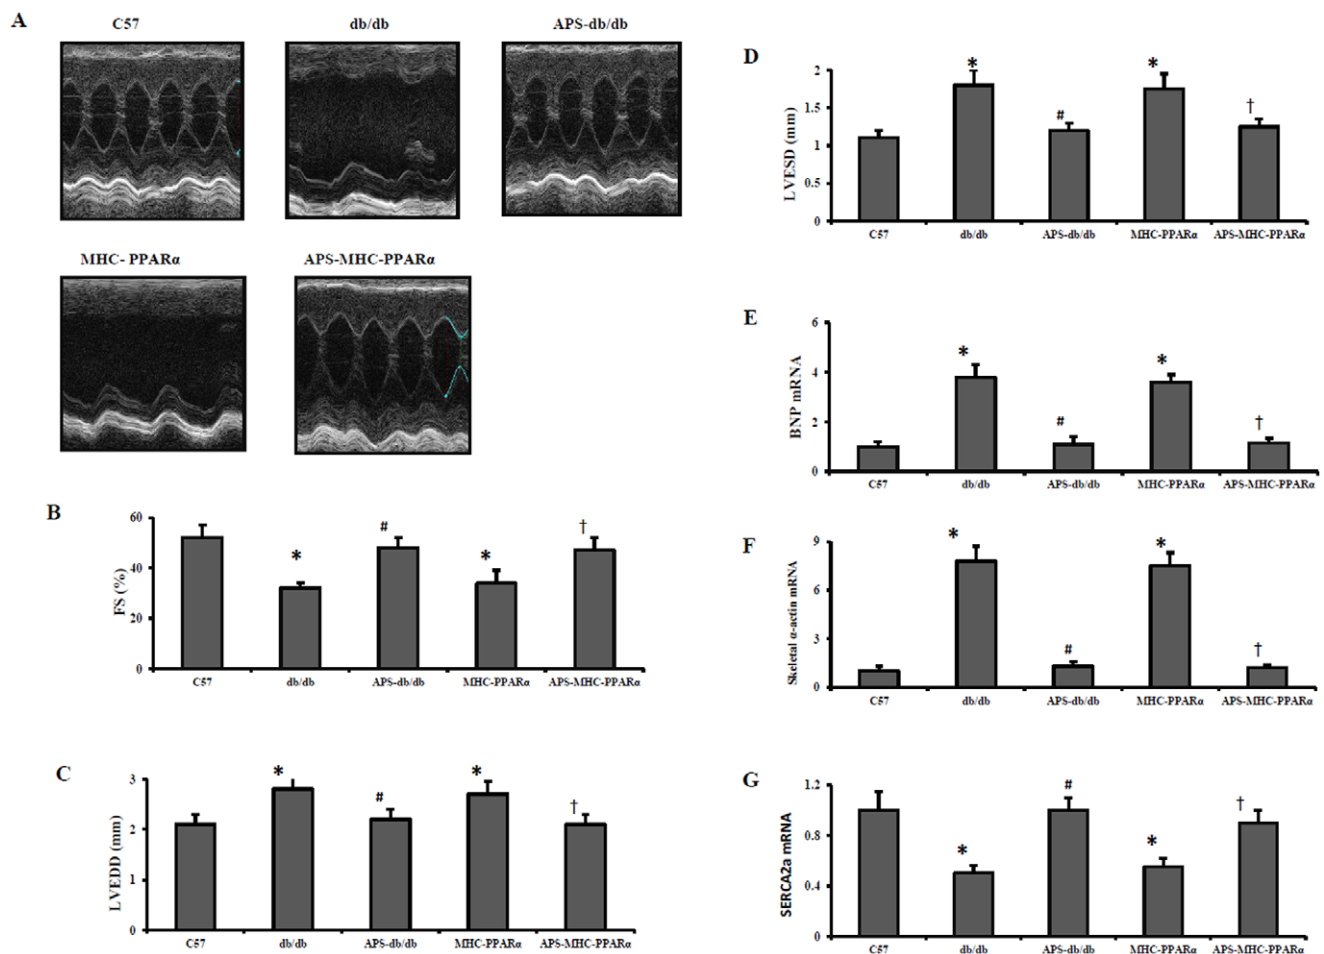

**Figure 1. Echocardiographic properties and expression of cardiac dysfunction marker genes in hearts of mice.** Echocardiographic studies were performed on db/db mice and MHC-PPAR $\alpha$  mice with or without APS administration at the age of 20 weeks, with C57 wide-type mice as normal control. (A) Representative echocardiographic images; (B) fractional shortening (FS). Expression of cardiac dysfunction marker genes encoding BNP (C), Skeletal  $\alpha$ -actin (D) and SERCA2a (E) was determined by real-time RT-PCR analysis. The relative gene expression of db/db mice and MHC-PPAR $\alpha$  mice was normalized to the value of C57 wide-type mice, and expressed as fold change. All groups  $n=8$ . Bars represent means  $\pm$  S.E.M. \* $P<0.05$  vs. C57 mice, # $P<0.05$  vs. untreated db/db mice, † $P<0.05$  vs. untreated MHC-PPAR $\alpha$  mice. BNP, brain-type natriuretic peptide; SERCA2a, sarcoplasmic/endoplasmic reticulum Ca<sup>2+</sup>ATPase 2a; MHC, myosin heavy chain; PPAR, peroxisome proliferator-activated receptor; APS, astragalus polysaccharides.

doi:10.1371/journal.pone.0045541.g001

**Table 1.** Hemodynamics and cardiac function in mice.

|            | Wt              | db/db            | APS+db/db        | MHC- PPAR $\alpha$ | APS+MHC- PPAR $\alpha$ |
|------------|-----------------|------------------|------------------|--------------------|------------------------|
| HR (bpm)   | 649 $\pm$ 27    | 585 $\pm$ 40     | 626 $\pm$ 32     | 525 $\pm$ 38       | 638 $\pm$ 35           |
| LVPWd (mm) | 0.68 $\pm$ 0.01 | 0.82 $\pm$ 0.03* | 0.72 $\pm$ 0.03# | 0.87 $\pm$ 0.03*   | 0.73 $\pm$ 0.02†       |
| IVSd (mm)  | 0.70 $\pm$ 0.01 | 0.84 $\pm$ 0.04* | 0.73 $\pm$ 0.02# | 0.85 $\pm$ 0.04*   | 0.72 $\pm$ 0.02†       |
| LVIDd (mm) | 3.2 $\pm$ 0.02  | 3.6 $\pm$ 0.04*  | 3.3 $\pm$ 0.03#  | 3.7 $\pm$ 0.04*    | 3.3 $\pm$ 0.03†        |
| LVPWs (mm) | 1.10 $\pm$ 0.06 | 1.42 $\pm$ 0.02* | 1.12 $\pm$ 0.06# | 1.45 $\pm$ 0.03*   | 1.11 $\pm$ 0.08†       |
| IVSs (mm)  | 1.13 $\pm$ 0.07 | 1.50 $\pm$ 0.04* | 1.16 $\pm$ 0.03# | 1.51 $\pm$ 0.05*   | 1.14 $\pm$ 0.04†       |
| LVIDs (mm) | 1.41 $\pm$ 0.05 | 2.48 $\pm$ 0.16* | 1.64 $\pm$ 0.10# | 2.52 $\pm$ 0.27*   | 1.63 $\pm$ 0.09†       |

Values are mean $\pm$ S.E.M. n=8 each group.

\*p<0.05 vs. wide type (Wt) mice;

#p<0.05 vs. untreated db/db mice;

†p<0.05 vs. untreated MHC-PPAR $\alpha$  mice.

HR, heart rate; LVPWd/s, left ventricular posterior wall thickness at diastole or systole; IVSd/s, interventricular septal wall thickness at diastole or systole; LVIDd/s, left ventricular internal diameter at diastole or systole.

doi:10.1371/journal.pone.0045541.t001

rescue cardiac dysfunction in diabetes directly, independent of its effect on systemic metabolic disorder.

### APS Prevented Myocardial Lipid Accumulation in db/db Mice and MHC-PPAR $\alpha$ Mice

Cardiomyocyte lipotoxicity is proved to contribute to diabetic cardiomyopathy [20]. To determine the role of APS treatment in the myocardial lipid accumulation that occurs in diabetic cardiomyopathy, the TAG content in db/db hearts and MHC-PPAR $\alpha$  hearts was analyzed. As expected, measurement of cardiac TAG content exhibited a large accumulation of neutral lipid in both db/db hearts and MHC-PPAR $\alpha$  hearts compared with those in Wt controls, while this lipid accumulation in db/db and MHC-PPAR $\alpha$  hearts was markedly attenuated by APS treatment (Figure 3). Further ESI/MS profiling of myocardial TAG species revealed that APS treatment mainly reversed the elevation of TAG-associated fatty acid with chain length of 18:0, 18:1 and 18:2 in db/db hearts and MHC-PPAR $\alpha$  hearts, compared with those in WT controls (Figure 3).

Furthermore, although APS treatment significantly reversed the serum hyperlipidemia in db/db mice to the normal serum lipid levels of MHC-PPAR $\alpha$  mice, there was no difference in the evident TAG accumulation between APS-treated db/db hearts and APS-treated MHC-PPAR $\alpha$  hearts (Figure 2 and 3). Collectively, these data showed that treatment with APS could prevent long chain fatty acid accumulation in diabetic hearts independent of its effect on systemic hyperlipidemia.

### APS Normalized Cardiac Glucose and FFA Metabolic Derangements in db/db Mice and MHC-PPAR $\alpha$ Mice

Diabetic cardiomyopathy exhibits myocardial fuel utilization abnormalities with increased FFA import/oxidation and reduced glucose utilization [21]. To assess the metabolic correlates of the functional rescue conferred by APS treatment in diabetes, myocardial substrate uptake and oxidation rates were determined in the isolated working hearts and awake mice from db/db mice and MHC-PPAR $\alpha$  mice. As predicted, the palmitate uptake rates and FFA oxidation rates were increased in both db/db hearts and MHC-PPAR $\alpha$  hearts, while the uptake and oxidation rates of glucose were decreased accordingly in db/db mice and MHC-PPAR $\alpha$  mice, compared with those of Wt hearts (Figure 4). Notably, the elevation of FFA uptake and oxidation rates in both db/db hearts and MHC-PPAR $\alpha$  hearts was substantially reduced

by APS treatment, whereas the reduction of cardiac glucose utilization in db/db hearts and MHC-PPAR $\alpha$  hearts was consistently normalized by APS treatment to the extent of Wt controls (Figure 4). Moreover, although therapy with APS had evident influence on the systematic hyperglycemia and hyperlipidemia in db/db mice, the beneficial effect of APS treatment on the normalization of cardiac glucose and FFA metabolic derangements were the same in db/db hearts and MHC-PPAR $\alpha$  hearts, indicating that APS might benefit cardiac substrate metabolism directly in diabetic cardiomyopathy.

### APS Influenced the Myocardial PPAR $\alpha$ Regulatory Pathway in db/db Mice and MHC-PPAR $\alpha$ Mice

Activation of myocardial PPAR $\alpha$  regulatory pathway mainly contributes to the pathogenesis of diabetic cardiomyopathy [19,22]. The expression of genes involved in myocardial fuel utilization paralleled the metabolic derangements in diabetic mice, with activated PPAR $\alpha$  target genes involved in cardiac FFA oxidation, and downregulated myocyte glucose uptake and oxidation programs. As expected, the protein release of fatty acid transporter fatty acid transport protein-1 (FATP 1) and fatty acyl-CoA synthetase 1 (FACS 1), served as LCFA transporters in hearts, was significantly elevated in db/db hearts and MHC-PPAR $\alpha$  hearts compared with that of Wt controls, whereas the increase was reduced by APS treatment (Figure 5 and 6). In addition, the protein secretion of PPAR $\alpha$  target genes involved in mitochondrial (muscle-type carnitine palmitoyl-transferase 1) and peroxisomal (acyl-CoA oxidase) fat oxidation pathways remained increased in db/db hearts and MHC-PPAR $\alpha$  hearts compared with that of Wt controls, while the elevation was intensely reversed by APS administration (Figure 5 and 6). Consistently, the induction of gene expression of PPAR $\alpha$  target genes involved in cardiac FFA import and oxidation in db/db hearts and MHC-PPAR $\alpha$  hearts was substantially reversed by APS treatment at the same time, to the extent of mRNA expressions in Wt controls (Figure 5 and 6). With comparison, the gene expression of the glucose transporter GLUT 4 and the negative regulator of glucose oxidation PKD4 (pyruvate dehydrogenase kinase 4) was normalized in the db/db hearts and MHC-PPAR $\alpha$  hearts by treatment with APS accordingly (Figure 5 and 6). To conclude, these findings suggested that APS treatment resulted in the normalization of myocardial PPAR $\alpha$  regulatory pathway in both db/db mice and MHC-PPAR $\alpha$  mice.

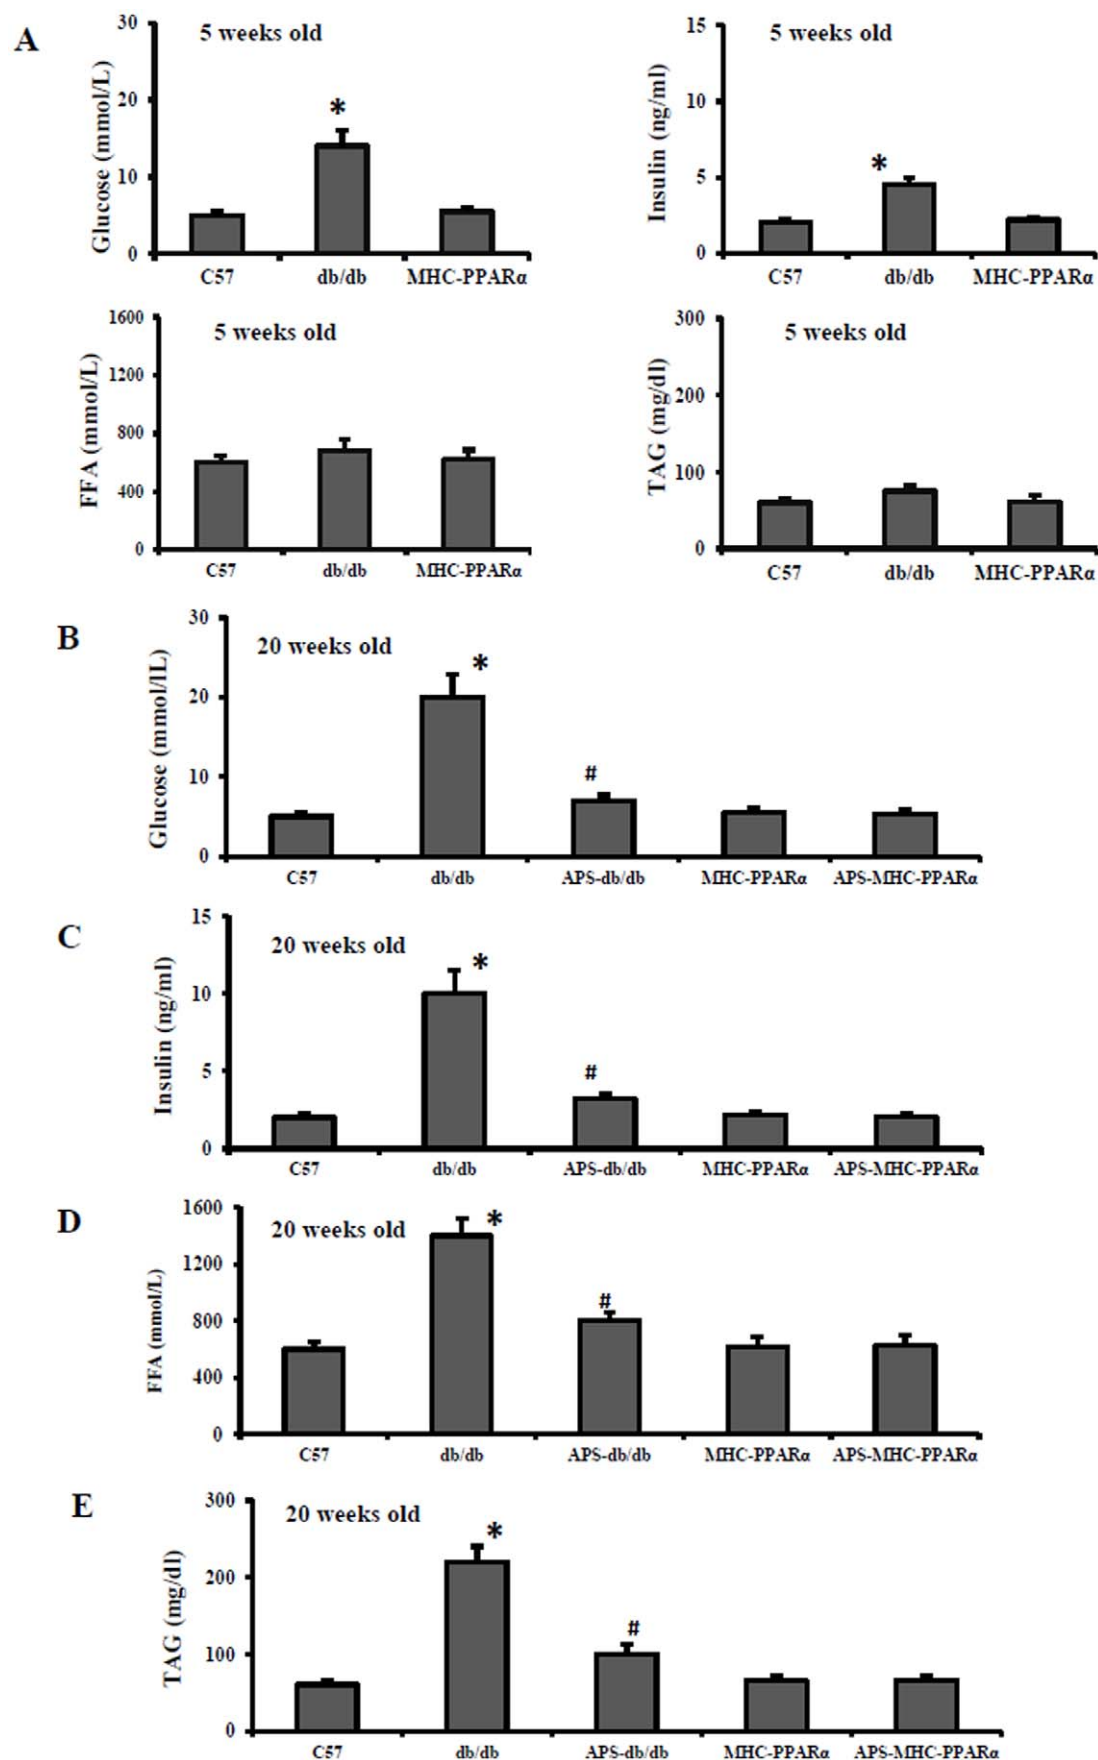



**Figure 2. Serum biometric parameters of mice at different age.** Serum glucose, insulin, nonesterified fatty acid (FFA) and triacylglyceride (TAG) were detected in db/db mice and MHC-PPAR $\alpha$  mice with or without APS administration at the age of 5 weeks (A) and 20 weeks (B–E) respectively, with C57 wide-type mice as normal control. All groups n = 8. Bars represent means  $\pm$  S.E.M. \* $P$  < 0.05 vs. C57 mice, #  $P$  < 0.05 vs. untreated db/db mice, †  $P$  < 0.05 vs. untreated MHC-PPAR $\alpha$  mice. doi:10.1371/journal.pone.0045541.g002

## Discussion

Growing evidence suggests that diabetic cardiomyopathy is common in diabetic individuals independent of hypertension and coronary artery disease [23]. The pathogenesis of diabetic cardiomyopathy is mainly associated with perturbations in cardiac energy metabolism. Fatty acids are the main source of energy production in normal hearts, whereas diabetes results in a marked reduction in cardiac glucose utilization and the heart relies almost exclusively on fatty acids (FFA) to generate energy [24]. Excess myocardial lipid accumulation due to an imbalance between fatty acid import and utilization, referred to as lipotoxicity, eventually promotes acquired forms of diabetic cardiomyopathies [25]. Multiple mechanisms contribute to the substrate switching that characterizes the diabetic heart. These include increased delivery of FFA, decreased insulin signaling, and activation of transcriptional pathways such as PPAR $\alpha$  signaling network that regulates myocardial substrate use. The activation of PPAR $\alpha$  gene

regulatory pathway has been identified as a driver of the metabolic derangements contributing to lipotoxicity and cardiomyopathic remodeling in the diabetic hearts [19,20].

PPAR $\alpha$ , one of the PPAR isoforms, is recognized as a key regulator of myocardial fatty acid metabolism [19]. In the heart, PPAR $\alpha$  activation induces expression of genes encoding nearly every step in the fatty acid utilization pathway including transport proteins to facilitate fatty acid uptake, acyl-coA synthetases for esterification of fatty acids to coenzyme A, fatty acid-binding proteins that facilitate delivery of fatty acids to different cellular compartments, mitochondrial carnitine system proteins that catalyze fatty acid transfer into the mitochondrion, every enzyme in the fatty acid  $\beta$ -oxidation pathway, and other accessory components of fatty acid metabolism such as uncoupling proteins [22,26]. Transgenic mice with cardiac-restricted over-expression of PPAR $\alpha$  (MHC-PPAR $\alpha$ ) exhibit the lipotoxic cardiomyopathic phenotype, including increased myocardial uptake and oxidation

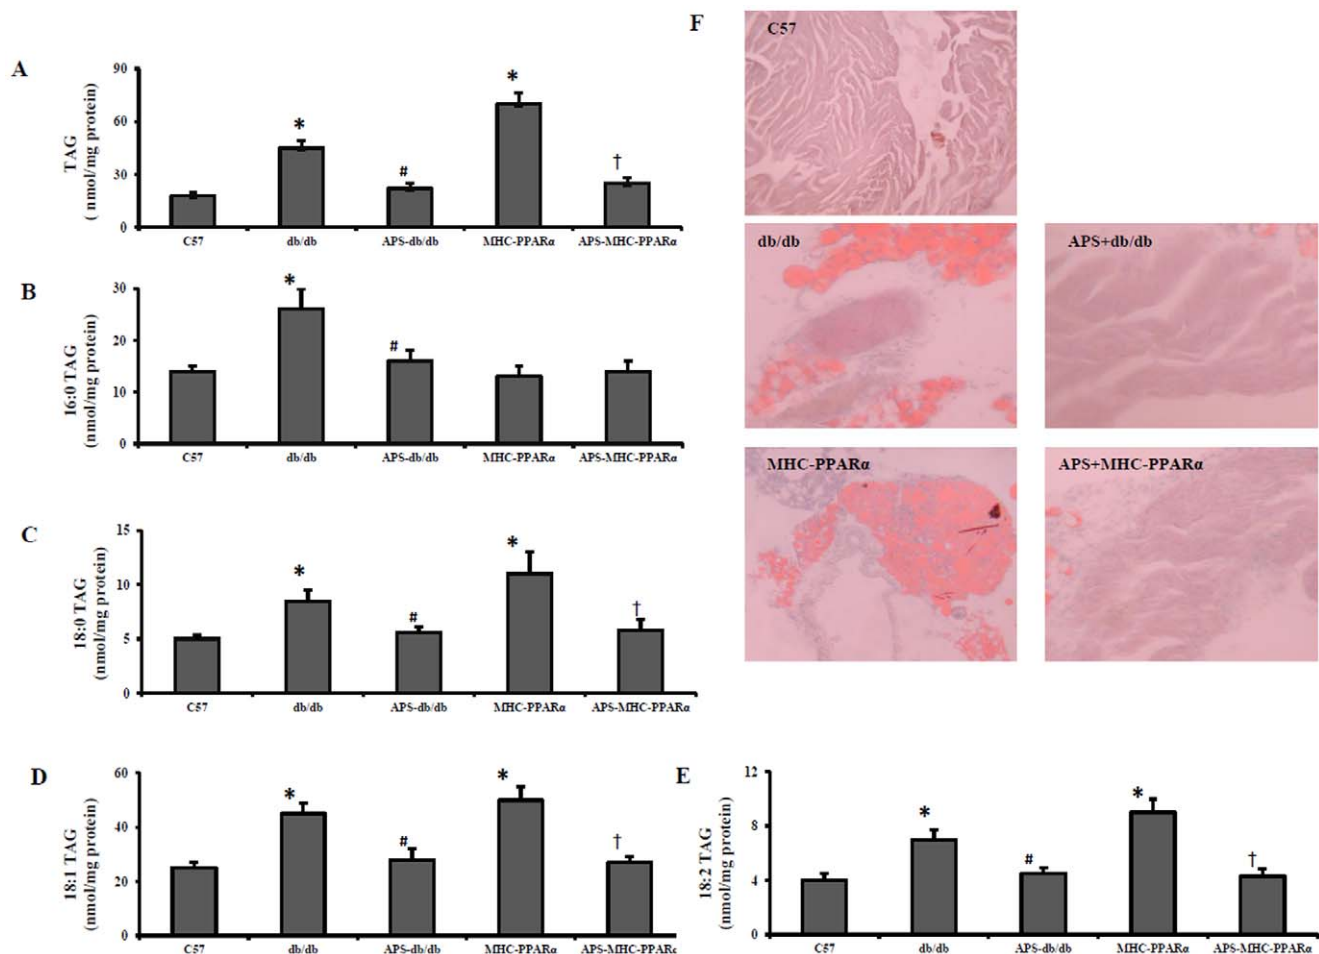

**Figure 3. Intramyocardial lipid accumulation in mice.** Myocardial triacylglyceride levels (A) in db/db mice and MHC-PPAR $\alpha$  mice with or without APS administration at 20 week-old were determined by ESI/MS. Mean levels of TAG-associated fatty acid with chain length of 16:0 (B), 18:0 (C), 18:1 (D), and 18:2 (E) in the hearts of each group were shown respectively. (F) representative images of myocardium stained with oil red O. All groups n = 8. Bars represent means  $\pm$  S.E.M. \* $P$  < 0.05 vs. C57 mice, #  $P$  < 0.05 vs. untreated db/db mice, †  $P$  < 0.05 vs. untreated MHC-PPAR $\alpha$  mice. doi:10.1371/journal.pone.0045541.g003

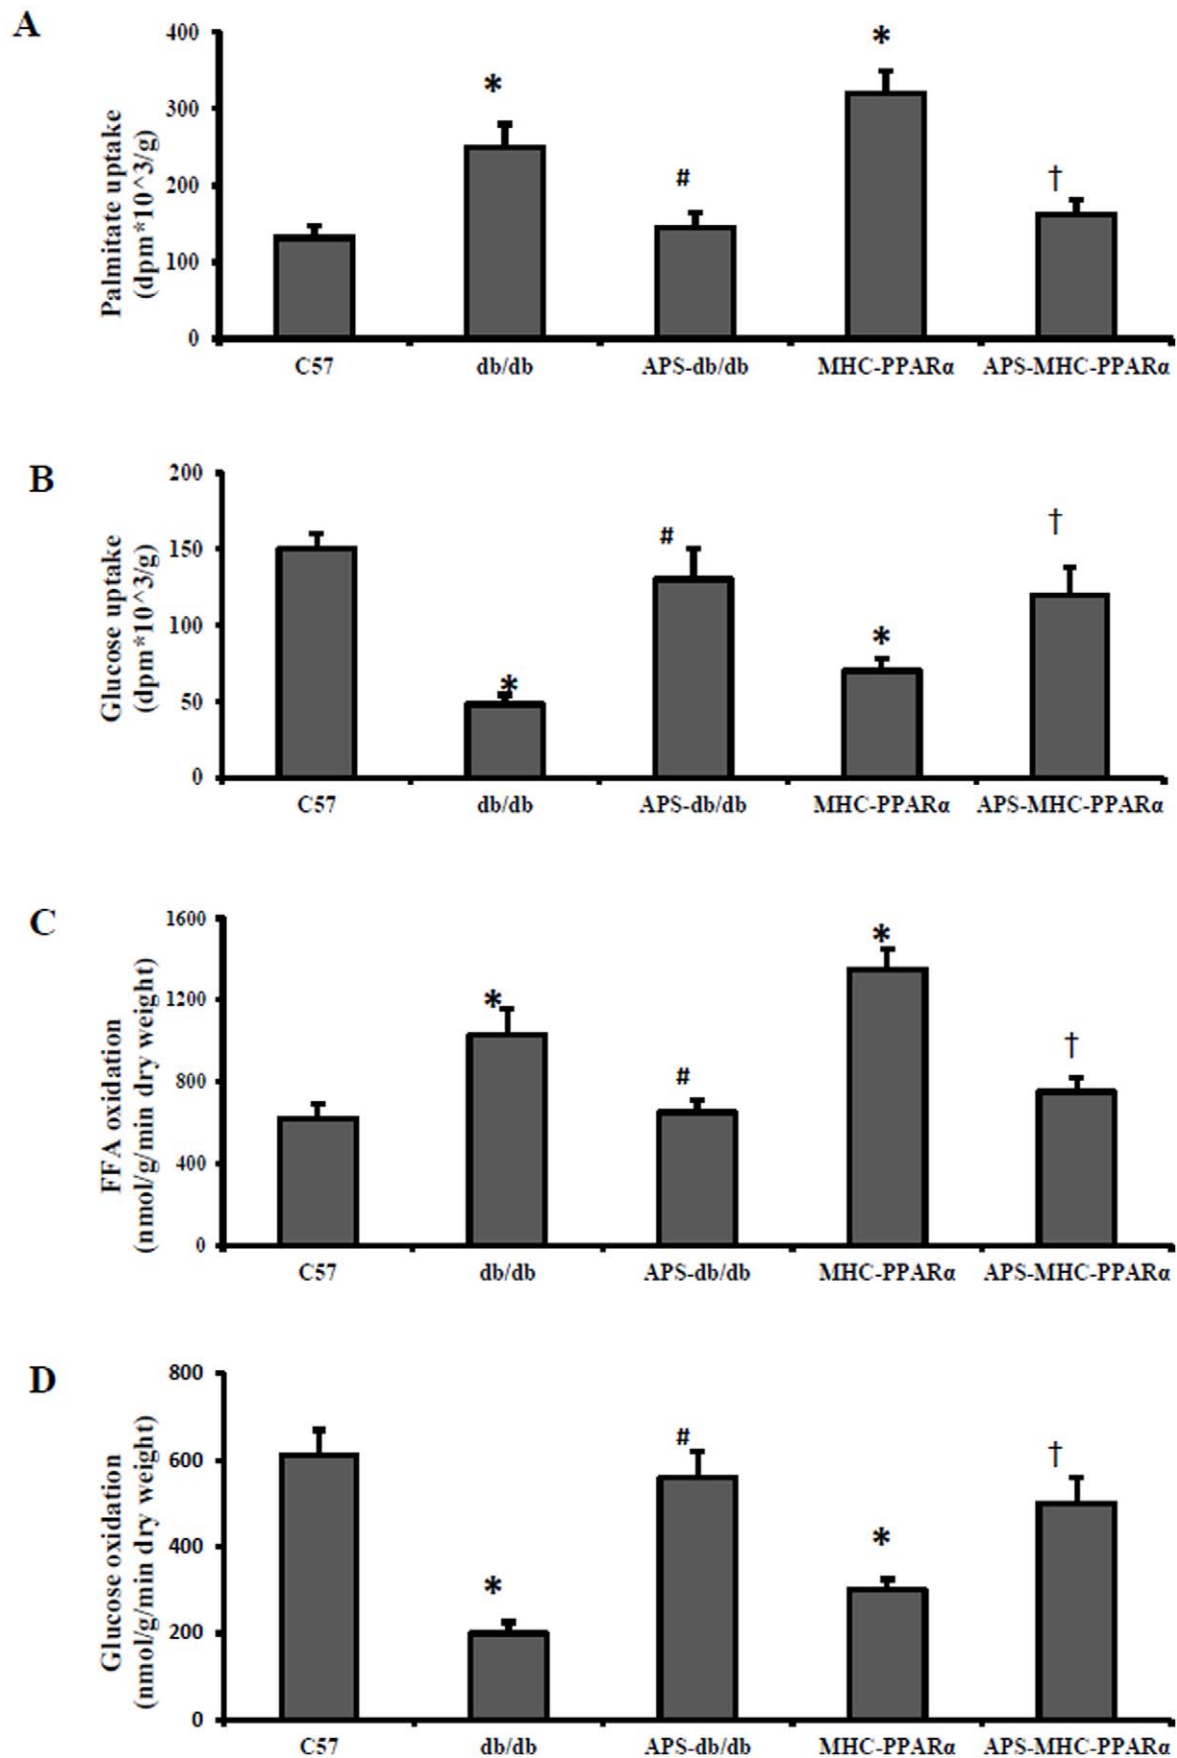

**Figure 4. Myocardial fuel utilization in mice at the age of 20 weeks.** Basal cardiac palmitate uptake (A) and glucose uptake (B) were measured in hearts from awake db/db mice and MHC-PPAR $\alpha$  mice with/without APS at the age of 20 weeks, with C57 mice as normal control. Free fatty acid oxidation (C) and glucose oxidation (D) were assessed in isolated working hearts from db/db mice and MHC-PPAR $\alpha$  mice with/without APS at the age of 20 weeks, with C57 mice as normal control. All groups n = 8. Bars represent means  $\pm$  S.E.M. \* $P$  < 0.05 vs. C57 mice, #  $P$  < 0.05 vs. untreated db/db mice, †  $P$  < 0.05 vs. untreated MHC-PPAR $\alpha$  mice. doi:10.1371/journal.pone.0045541.g004

of FAs, myocyte TAG accumulation, reduced glucose utilization, characterized as metabolic and functional signatures of the diabetic heart. Mice with generalized deletion of PPAR $\alpha$  (PPAR $\alpha$ -null mice) demonstrate decreased fatty acid oxidation rates and concomitant increased glucose oxidation rates [22,26]. In a murine model of pressure overload-induced cardiac hypertrophy, reactivation of PPAR $\alpha$  with an agonist resulted in severe depression of cardiac power and efficiency [26,27]. Studies in ob/ob and db/db mice also showed that [27,28], while cardiac

caloric excess became longstanding, activation of PPAR $\alpha$ -mediated signaling increased the expression genes involved in FFA oxidation and FFA import such as CPT-1 and medium- and long-chain acyl CoA dehydrogenase, and FFA transporters such as FATP1, FACS1 and CD36, which contributed further to the metabolic changes in the heart; whereas the activation of PPAR $\alpha$  increased the expression of PDK4, which further reduces glucose oxidation in myocardium. Therefore, the PPAR $\alpha$  mediated

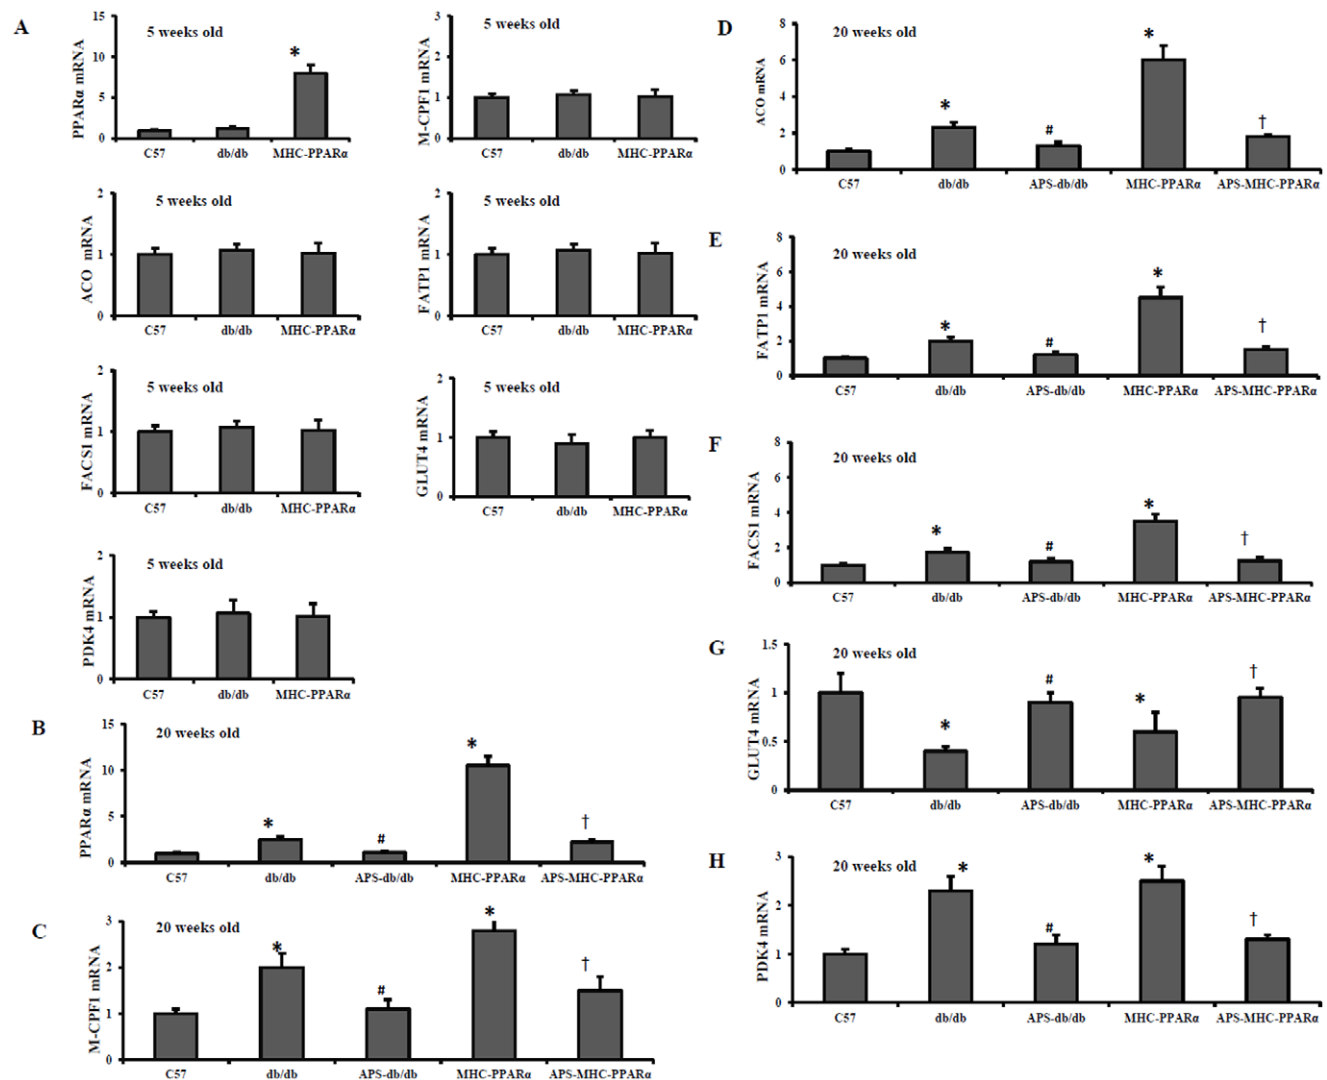



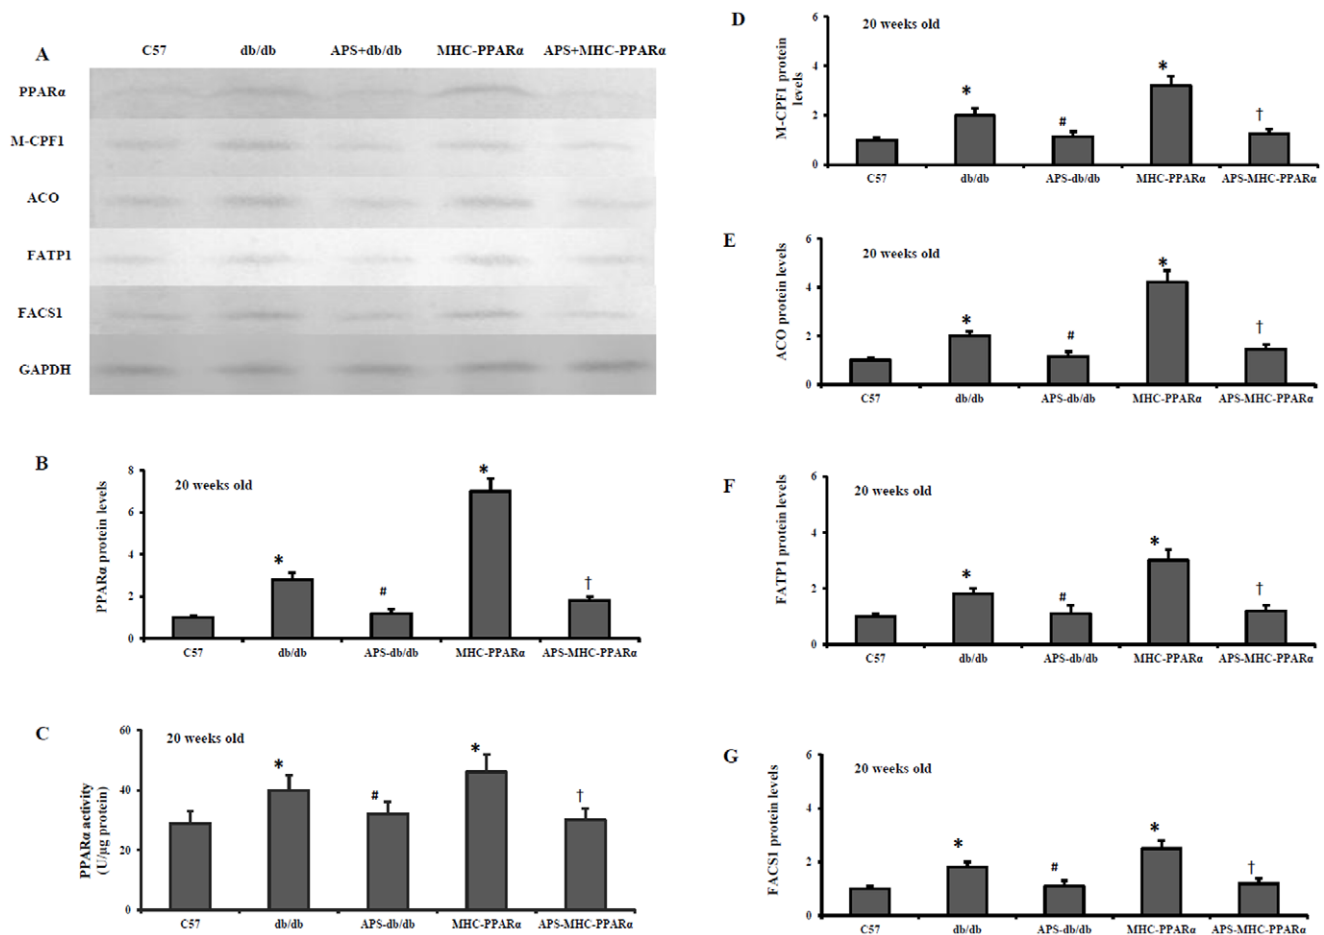

**Figure 6. Protein levels of PPAR $\alpha$  target genes in hearts of mice at the age of 20 weeks.** Cardiac tissues from db/db mice and MHC-PPAR $\alpha$  mice with/without APS administration were detected for the protein expression at the age of 20 weeks, with C57 mice as normal control. Myocardial protein levels of PPAR $\alpha$  target genes were determined by Western Blot analysis. (A) Representative autoradiographs of PPAR $\alpha$  target genes and GAPDH (loading control) using specific antibodies. Protein levels of PPAR $\alpha$  target genes in myocardium, encoding PPAR $\alpha$  (B), M-CPF 1 (D), ACO (E), FATP 1(F) and FACS 1(G). PPAR $\alpha$  activities in myocardial tissue were also determined at the end of the experiment by RIA (C). All groups  $n=8$ . Bars represented means  $\pm$  S.E.M., and were corrected for GAPDH signal intensity and normalized to the value of C57 wide-type mice. \* $P<0.05$  vs. C57 mice, #  $P<0.05$  vs. untreated db/db mice, †  $P<0.05$  vs. untreated MHC-PPAR $\alpha$  mice. doi:10.1371/journal.pone.0045541.g006

lipotoxic cardiomyopathy is one of the important mechanisms in the pathogenesis of diabetic cardiomyopathy.

Astragalus (the root of *Astragalus membranaceus*, Huangqi), a traditional Chinese medicine, has been widely used in the clinical treatment of heart failure. Astragalus polysaccharides (APS) is a hydrosoluble component extracted from *Astragalus* and has been identified as its mainly bioactive ingredient [15]. Our previous study showed that treatment with APS rescued cardiac dysfunction and myocardial pathologic abnormality in diabetic animal models along with the improvement of the systemic derangement including hyperglycemia, hyperinsulinemia and hyperlipidemia [13–15]. However, it is still unclear whether APS could improve diabetic cardiomyopathy by preventing myocardial lipotoxicity, through a direct molecular mechanism independent of its effect on the systemic diabetic state. In an attempt to explore the underlying mechanism, diabetic db/db mice and MHC-PPAR $\alpha$  mice were employed and treated with APS in our study. As speculated, the myocardial energy metabolic derangements leading to the deterioration of cardiac function in both db/db mice and MHC-PPAR $\alpha$  mice were markedly inhibited by treatment with APS, with the reversal of developed LV chamber dilatation and systolic

ventricular dysfunction, consistent with the reduction of activated gene expression of cardiac dysfunctional gene markers. In present study, the increased FFA utilization and decreased uptake and oxidation of glucose in diabetic hearts and MHC-PPAR $\alpha$  hearts were also strikingly normalized by APS treatment with several lines of evidence to support. Firstly, APS threw a dramatic effect on the inhibition of enhanced TAG accumulation and the normalization of derangements of fatty acid composition in db/db diabetic hearts and MHC-PPAR $\alpha$  hearts. Secondly, APS effectively reprogrammed the unbalance of substrate metabolism in db/db diabetic hearts and MHC-PPAR $\alpha$  hearts with the decreased myocardial fatty acid utilization rates and the increased rates of glucose uptake and oxidation in myocardium. In addition, the increase of gene expressions and protein levels of PPAR $\alpha$  target genes in db/db diabetic hearts and MHC-PPAR $\alpha$  hearts, involved in fatty acid import and oxidation, was markedly reversed by APS administration. Finally, the abnormality of gene regulatory pathway referred to the derangements in glucose utilization observed in db/db diabetic hearts and MHC-PPAR $\alpha$  hearts was also normalized with APS treatment partly via PPAR $\alpha$ . Notably, although the normal systemic metabolic state in MHC-

PPAR $\alpha$  mice was not affected by treatment with APS, compared with the significant reversal of hyperglycemia and hyperlipidemia in db/db mice after therapy with APS, the prevention of cardiac dysfunction and myocardial lipotoxicity in the APS-treated MHC-PPAR $\alpha$  mice is almost the same with that in the APS-treated db/db diabetic mice, which in turn further demonstrated that therapy with APS could rescue diabetic cardiomyopathy directly, independent of its influence on the systemic metabolic disorders. Summarily, our findings support the notion that treatment of APS has a beneficial effect on lipotoxic cardiomyopathy in diabetes through a mechanism mainly dependent on the modulation of PPAR $\alpha$  regulatory pathway.

## References

1. Rogger VL, Go AS, Lloyd-Jones DM, Adams RJ, Berry JD, et al. (2011) Heart disease and stroke statistics-2011 update: a report from the American Heart Association. *Circulation* 123(4): e18–e209.
2. Witteles RM, Fowler MB (2008) Insulin-resistant cardiomyopathy clinical evidence, mechanisms, and treatment options. *J Am Coll Cardiol* 51(2): 93–102.
3. Battiprolu PK, Gillette TG, Wang ZV, Lavandro S, Hill JA (2010) Diabetic cardiomyopathy: mechanisms and therapeutic targets. *Drug Discov Today Dis Mech* 7(2): e135–e143.
4. Carley AN, Severson DL (2005) Fatty acid metabolism is enhanced in type 2 diabetic hearts. *Biochim Biophys Acta* 1734: 112–126.
5. Lopaschuk GD (2002) Metabolic abnormalities in the diabetic heart. *Heart Fail Rev* 7: 149–159.
6. Taegtmeyer H, McNulty P, Young ME (2002) Adaptation and maladaptation of the heart in diabetes: Part I: general concepts. *Circulation* 105: 1727–1733.
7. Buchanan J, Mazumder PK, Hu P, Chakrabarti G, Roberts MW, et al. (2005) Reduced cardiac efficiency and altered substrate metabolism precedes the onset of hyperglycemia and contractile dysfunction in two mouse models of insulin resistance and obesity. *Endocrinology* 146: 5341–5349.
8. Semeniuk LM, Kryski AJ, Severson DL (2002) Echocardiographic assessment of cardiac function in diabetic db/db and transgenic db/db-hGLUT4 mice. *Am J Physiol Heart Circ Physiol* 283: H976–H982.
9. Belke DD, Larsen TS, Gibbs EM, Severson DL (2000) Altered metabolism causes cardiac dysfunction in perfused hearts from diabetic (db/db) mice. *Am J Physiol Endocrinol Metab* 279: E1104–E1113.
10. Stanley WC, Chandler MP (2002) Energy metabolism in the normal and failing heart: potential for therapeutic interventions. *Heart Fail Rev* 7: 115–130.
11. Thrainsdottir IS, von Bibra H, Malmberg K, Ryden L (2004) Effects of trimetazidine on left ventricular function in patients with type 2 diabetes and heart failure. *J Cardiovasc Pharmacol* 44: 101–108.
12. Rogers JH, Tamirisa P, Kovacs A, Weinheimer C, Courtois M, et al. (1999) RGS4 causes increased mortality and reduced cardiac hypertrophy in response to pressure overload. *J Clin Invest* 104: 567–576.
13. Chen W, Yu M, Li Y (2008) Astragalus Polysaccharides: An Effective Treatment for Diabetes Prevention in NOD Mice. *Exp Clin Endocrinol Diabetes* 116(8): 468–474.
14. Chen W, Yu M, Li Y (2010) Astragalus polysaccharides inhibited diabetic cardiomyopathy in hamsters depending on suppression of heart chymase activation. *J Diabetes Complica* 24(3): 199–208.
15. Chen W, Yu M, Li Y, Chen WJ, Xia Y (2010) Beneficial effects of astragalus polysaccharides treatment on cardiac chymase activities and cardiomyopathy in diabetic hamsters. *Acta Diabetol* 47 (Suppl 1): S35–S46L.
16. Takahashi R, Okumura K, Matsui H, Saburi Y, Kamiya H, et al. (2003) Impact of  $\alpha$ -tocopherol on cardiac hypertrophy due to energy metabolism disorder: the involvement of 1,2-diacylglycerol. *Cardiovasc Res* 58: 565–74.
17. Saburi Y, Okumura K, Matsui H, Hayashi K, Kamiya H, et al. (2003) Changes in distinct species of 1,2-diacylglycerol in cardiac hypertrophy due to energy metabolism disorder. *Cardiovasc Res* 57: 92–100.
18. Belke DD, Larsen TS, Lopaschuk GD, Severson DL (1999) Glucose and fatty acid metabolism in the isolated working mouse heart. *Am J Physiol* 277: R1210–R1217.
19. Finck B, Lehman JJ, Leone TC, Welch MJ, Bennett MJ, et al. (2002) The cardiac phenotype induced by PPAR $\alpha$  overexpression mimics that caused by diabetes mellitus. *J Clin Invest* 109: 121–130.
20. Finck B, Han X, Courtois M, Aimond F, Nerbonne JM, et al. (2003) A critical role for PPAR $\alpha$ -mediated lipotoxicity in the pathogenesis of diabetic cardiomyopathy: Modulation of phenotype by dietary fat content. *Proc Natl Acad Sci USA* 100: 1226–1231.
21. Proornima IG, Parikh P, Shannon RP (2006) Diabetic cardiomyopathy: the search for a unifying hypothesis. *Circ Res* 98: 596–605.
22. Watanabe K, Fujii H, Takahashi T, Kodama M, Aizawa Y, et al. (2000) Constitutive regulation of cardiac fatty acid metabolism through peroxisome proliferator-activated receptor  $\alpha$  associated with age-dependent cardiac toxicity. *J Biol Chem* 275: 22293–22299.
23. Rubler S, Dlugash J, Yuceoglu YZ, Kumral T, Branwood AW, et al. (1972) New type of cardiomyopathy associated with diabetic glomerulosclerosis. *Am J Cardiol* 30: 595–602.
24. Gamble J, Lopaschuk GD (1994) Glycolysis and glucose oxidation during reperfusion of ischemic hearts from diabetic rats. *Biochim Biophys Acta* 1225: 191–199.
25. Schaffer JE (2003) Lipotoxicity: when tissues overeat. *Curr Opin Lipidol* 14: 281–287.
26. Young ME, Laws FA, Goodwin GW, Taegtmeyer H (2001) Reactivation of peroxisome proliferator-activated receptor  $\alpha$  is associated with contractile dysfunction in hypertrophied rat heart. *J Biol Chem* 276: 44390–44395.
27. Duncan JG, Fong JL, Medeiros DM, Finck BN, Kelly DP (2007) Insulin-resistant heart exhibits a mitochondrial biogenic response driven by the peroxisome proliferator-activated receptor- $\alpha$ /PGC-1  $\alpha$  gene regulatory pathway. *Circulation* 115: 909–917.
28. Yang J, Sambandam N, Ham X, Gross RW, Courtosis M, et al. (2007) CD36 deficiency rescues lipotoxic cardiomyopathy. *Circ Res* 100: 1208–1217.

## Supporting Information

### Table S1 The sequences of primers used for real-time PCR analysis.

(TIF)

## Author Contributions

Conceived and designed the experiments: Wei Chen YZ HY YL. Performed the experiments: Wenjie Chen XZ HW. Analyzed the data: Wei Chen MY. Contributed reagents/materials/analysis tools: XZ YX HW Wenjie Chen. Wrote the paper: Wei Chen.
